# Supplementary material for: Collaborative hydrothermal and calcination fabrication of ZnOS heterostructures for visible-light-driven H2 production
Source: Royal Society of Chemistry journal article supplement (doi:10.1039/d2cp05351a), 2023-01-01
Supplement: d2cp05351a1.pdf [file d2cp05351a1.pdf]

## Supporting Information

### Collaboratively Hydrothermal and Calcination Fabrication of ZnOS Heterostructures for Visible-Light-Driven H<sub>2</sub> Production

XueLi Chen<sup>a\*</sup>, ChenXiang Lin<sup>b</sup>, LanHai Lai<sup>a</sup>, MingRui Liu<sup>c</sup>, Kai Zheng<sup>a</sup>, SongTao Li<sup>a</sup>, HaiTao Li<sup>a\*</sup>

a Jiangxi Provincial Key Laboratory of Low-Carbon Solid Waste Recycling, School of Geography and Environmental Engineering, Gannan Normal University, Ganzhou 341000, P. R. China.

b Guangxi Key Laboratory of Natural Polymer Chemistry and Physics, Nanning Normal University, Nanning 530001, China.

c Foshan Xianhu Laboratory of the Advanced Energy Science and Technology Guangdong Laboratory, Foshan 528216, PR China.

**\*Corresponding Author:** Xueli Chen (e-mail: [xueli089@foxmail.com](mailto:xueli089@foxmail.com)); Haitao Li (e-mail: [lihaitao103904@126.com](mailto:lihaitao103904@126.com)).

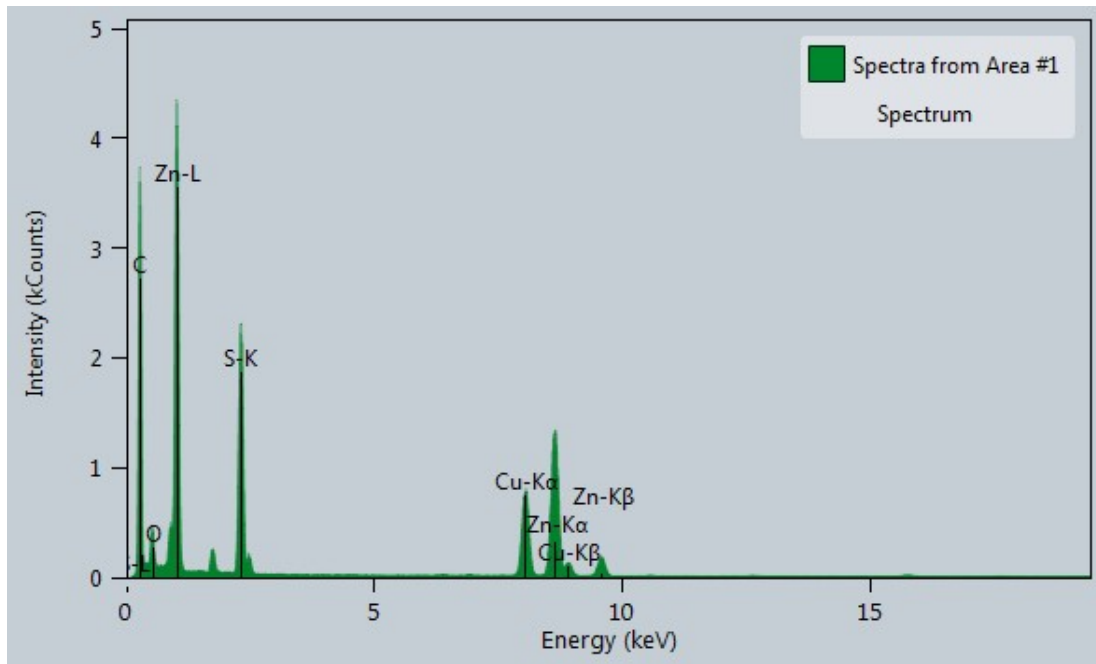

**Figure S1.** SEM spectra of ZnOS-3.

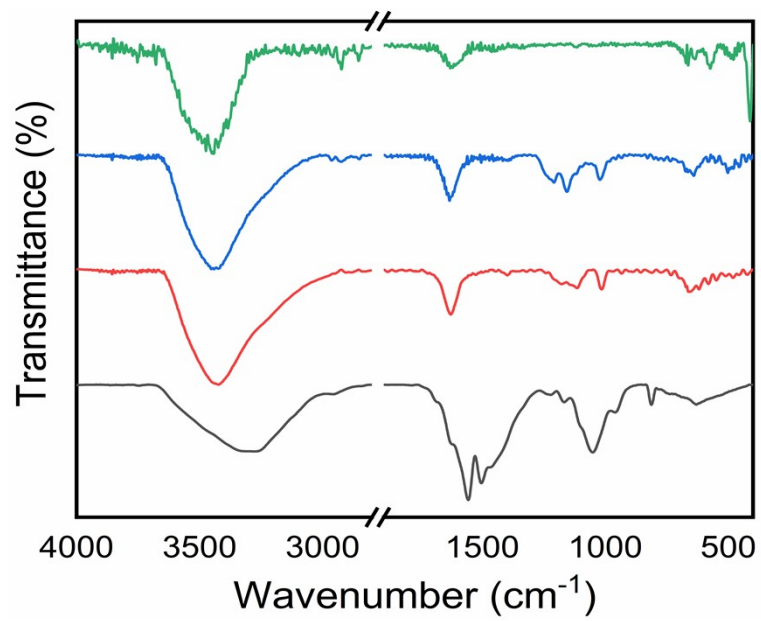

**Figure S2.** FT-IR spectra of ZnOS-X.

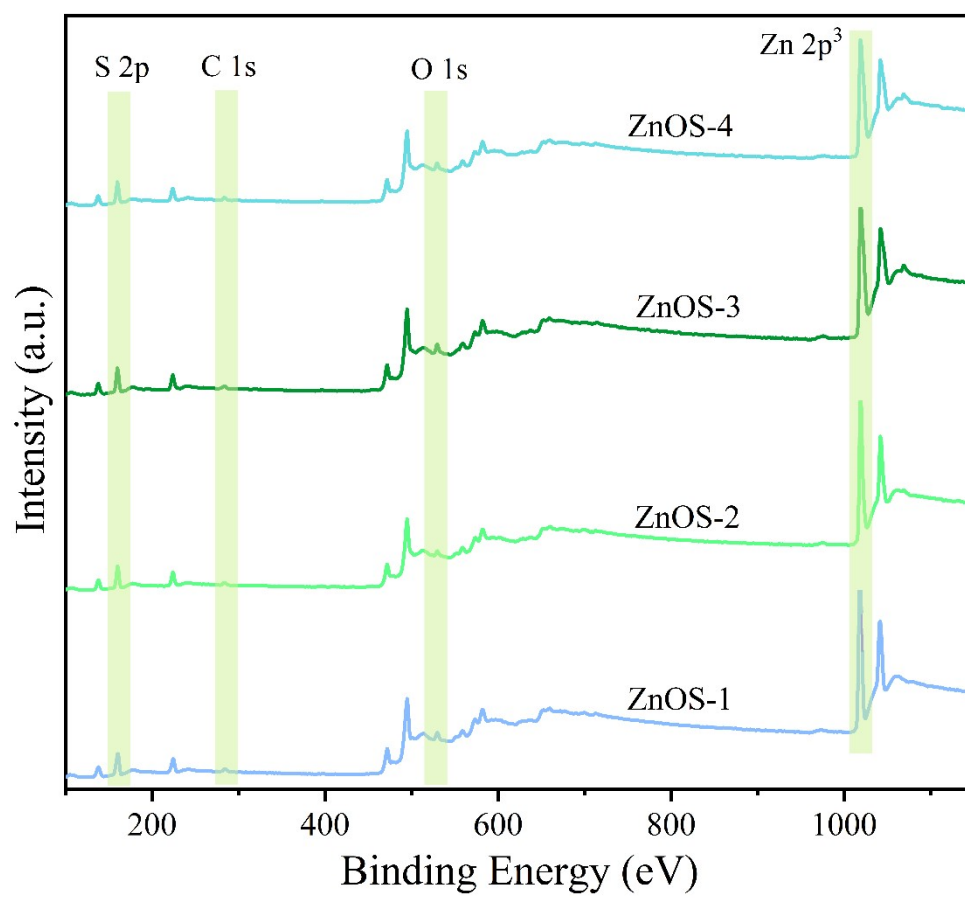

**Figure S3.** XPS survey spectrum of ZnOS-x.

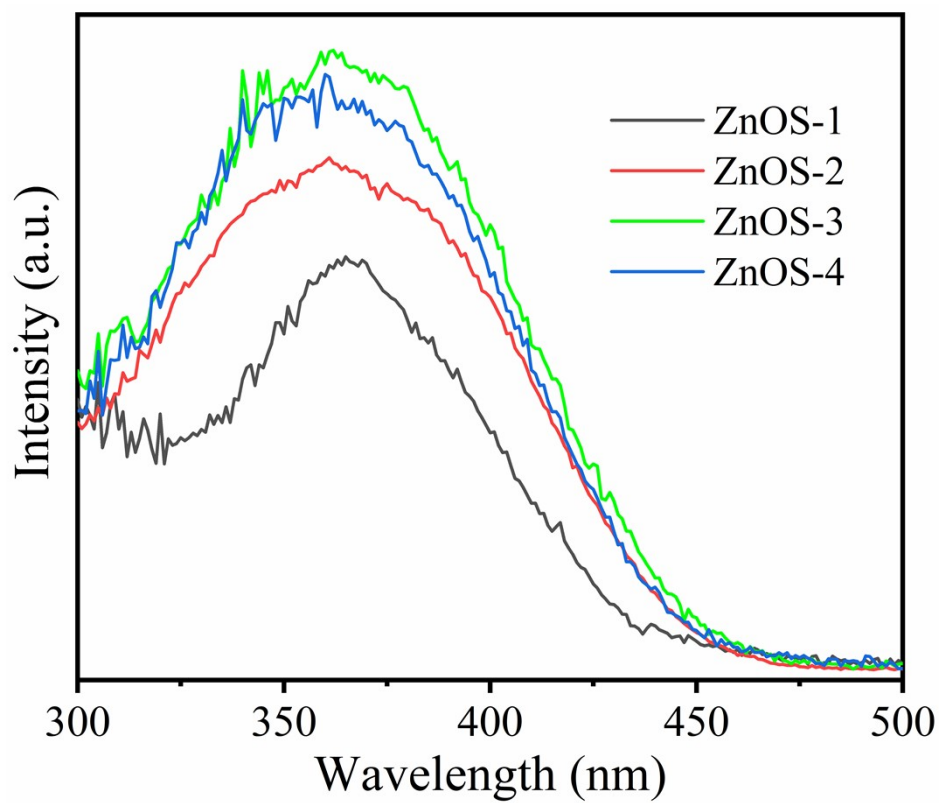

**Figure S4.** UV-vis diffuse-reflectance spectra of ZnOS-x.

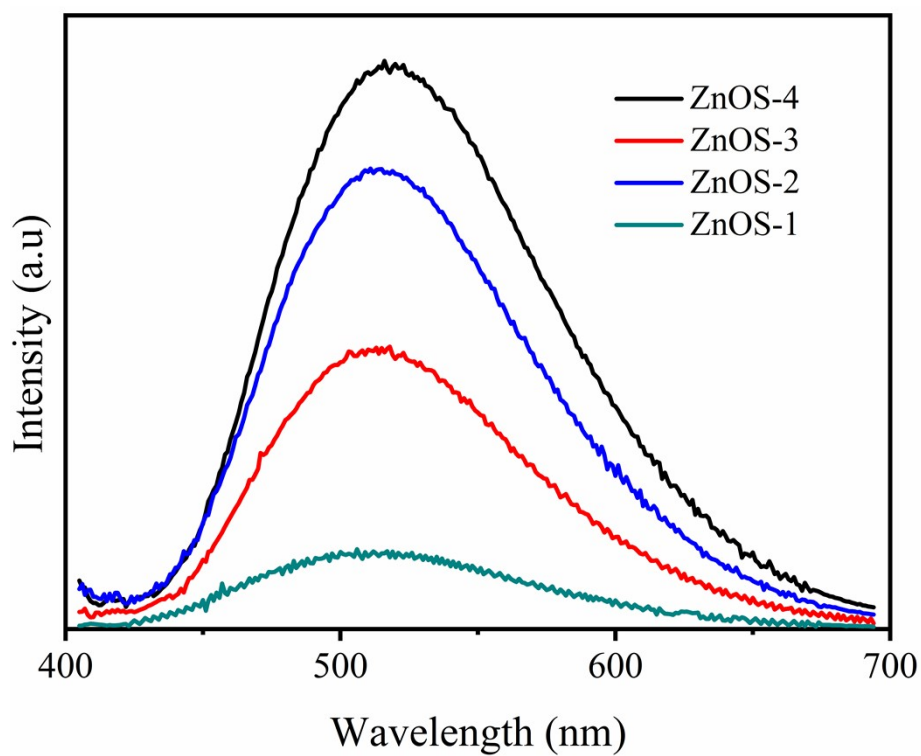

**Figure S5.** Photoluminescence emission spectra (excitation wavelength = 360nm) of ZnOS-x.

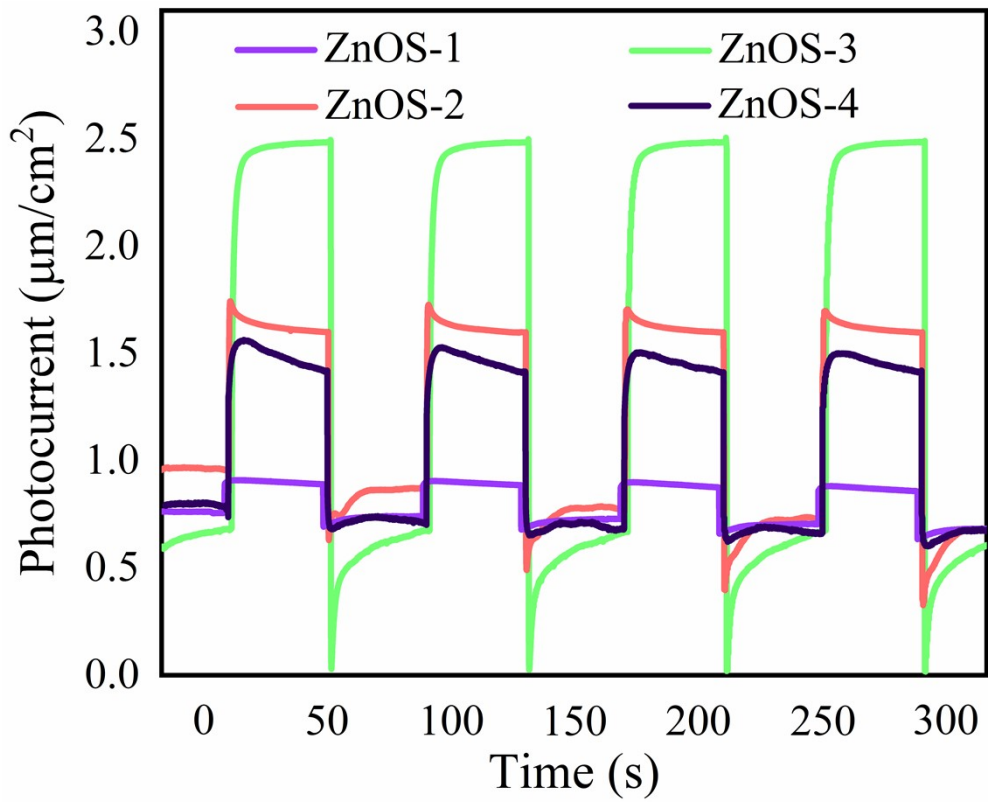

**Figure S6.** photocurrent-time dependence of ZnOS-x.

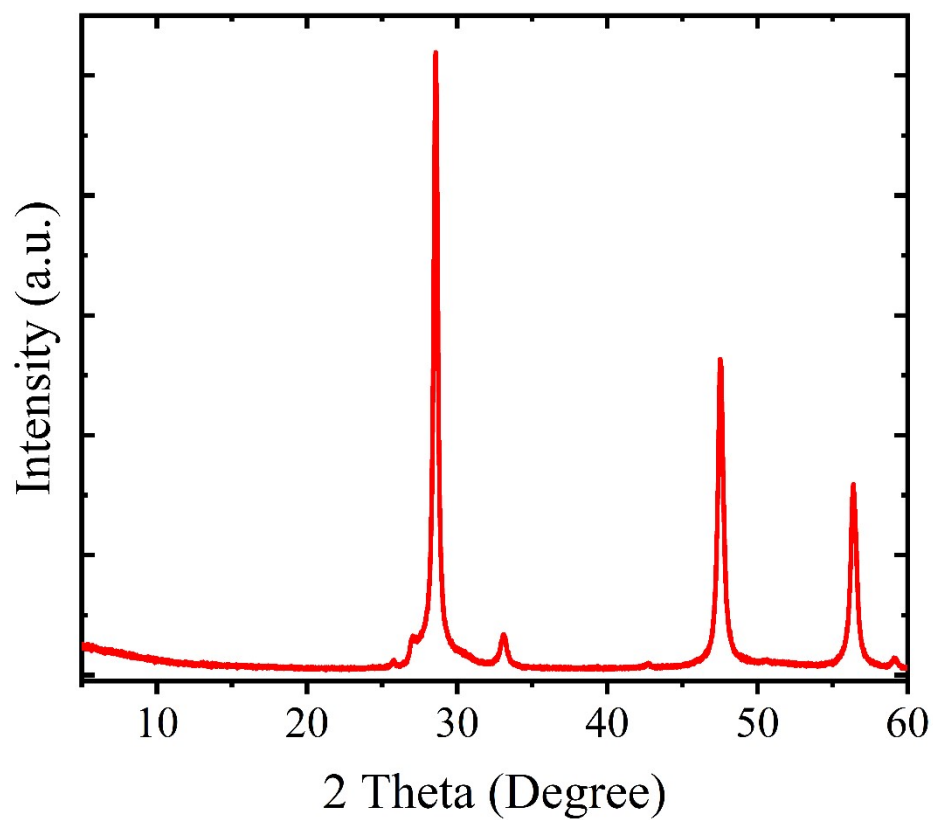

**Figure S7.** PXRD patterns of ZnOS-3 after photocatalytic H<sub>2</sub> evolution reaction.



**Table S1** Specific surface area of the ZnOS-x.

|        | $S_{\text{BET}}$ (m <sup>2</sup> /g) | R <sup>2</sup> | C       |
|--------|--------------------------------------|----------------|---------|
| ZnOS-1 | 17                                   | 0.99994        | 87.7    |
| ZnOS-2 | 19.2                                 | 0.99994        | 83.693  |
| ZnOS-3 | 20.2                                 | 0.99995        | 75.192  |
| ZnOS-4 | 4                                    | 0.99959        | 101.163 |

**Table S2** ICP-MS results for the molar ratio of of the ZnOS-3 before and after photocatalytic reaction.

|              | before | after |
|--------------|--------|-------|
| ZnOS-3 (ppm) | 2.56   | 2.18  |
